# Supplementary material for: The Use of Artificially Intelligent Self-Diagnosing Digital Platforms by the General Public: Scoping Review
Source: PubMed Central journal article supplement (PMC6658267; doi:10.2196/13445), 2019-05-01
Supplement: medinform_v7i2e13445_app1.pdf [file medinform_v7i2e13445_app1.pdf]

## Pubmed Search Strategy

**Step 1. Isolate the main concepts** of the research topic. (Add/subtract columns as needed). List all relevant search terms for each concept. Include author keywords and subject headings (i.e. MeSH headings)

| Concept 1                                                                                                                                                                                                                      | Concept 2                                                                                                                                                                                                                                                                                                                                                                                                          | Concept 3                                                                                                                                                 |
|--------------------------------------------------------------------------------------------------------------------------------------------------------------------------------------------------------------------------------|--------------------------------------------------------------------------------------------------------------------------------------------------------------------------------------------------------------------------------------------------------------------------------------------------------------------------------------------------------------------------------------------------------------------|-----------------------------------------------------------------------------------------------------------------------------------------------------------|
| Self diagnosing[tiab] OR self diagnosis[tiab] OR self evaluation*[tiab] OR self appraisal*[tiab] OR symptom check*[tiab] OR check your symptom*[tiab] OR check their symptom*[tiab] OR self triage[tiab] OR self-triage [tiab] | Technolog*[tiab] OR technology[mesh:noexp] OR website*[tiab] OR online[tiab] OR computing methodologies[mesh] OR computer* [tiab] OR algorithm*[tiab] OR mhealth[tiab] OR m-health [tiab] OR ehealth[tiab] OR e-health [tiab] OR app[tiab] OR apps[tiab] OR mobile application[tiab] OR smartphone[mesh] OR smart phone*[tiab] OR smartphone*[tiab] OR cell phone*[tiab] OR cellular phone*[tiab] OR mobile phone* | Population [tiab] OR person*[tiab] OR patient [tiab] OR patients [tiab] OR individual*[tiab] OR consumer* [tiab] OR people [tiab] OR patients[mesh:noexp] |

**Step 2. Translate the above list into a search statement.** Create one search strategy rather than multiple searches. Combine the search terms using AND/OR and brackets ( ). Use Line #s to organize longer searches.

(((Self diagnosing[tiab] OR self diagnosis[tiab] OR self evaluation\*[tiab] OR self appraisal\*[tiab] OR symptom check\*[tiab] OR check your symptom\*[tiab] OR check their symptom\*[tiab] OR self triage[tiab] OR self-triage [tiab]) AND ( ( English[lang] OR French[lang] ) ))) AND ((Technolog\*[tiab] OR technology[mesh:noexp] OR website\*[tiab] OR online[tiab] OR computing methodologies[mesh] OR computer\* [tiab] OR algorithm\*[tiab] OR mhealth[tiab] OR m-health [tiab] OR ehealth[tiab] OR e-health [tiab] OR app[tiab] OR apps[tiab] OR mobile application[tiab] OR smartphone[mesh] OR smart phone\*[tiab] OR smartphone\*[tiab] OR cell phone\*[tiab] OR cellular phone\*[tiab] OR mobile phone\*) AND ( ( English[lang] OR French[lang] ) ))) AND ((Population [tiab] OR person\*[tiab] OR patient [tiab] OR patients [tiab] OR individual\*[tiab] OR consumer\* [tiab] OR people [tiab] OR patients[mesh:noexp]) AND ( ( English[lang] OR French[lang] ) )))

**Step 3.** Retrieve articles (n=611)

**Step 4.** Filter by language: English and French
